# Supplementary material
Source: PubMed Central journal article supplement (PMC1199533)
Supplement: genores_gr.3873705_1.pdf [file genores_gr.3873705_1.pdf]

# Supplementary Figure 1A.

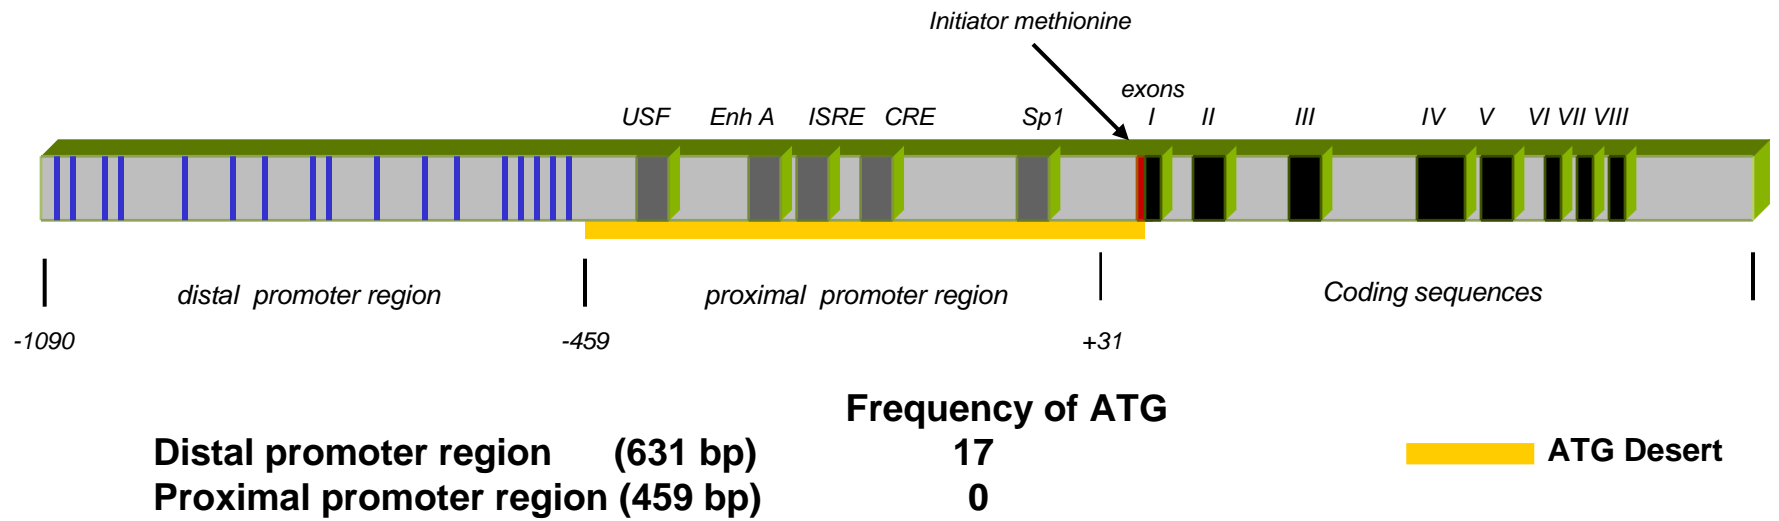

Supplementary Figure 1B.

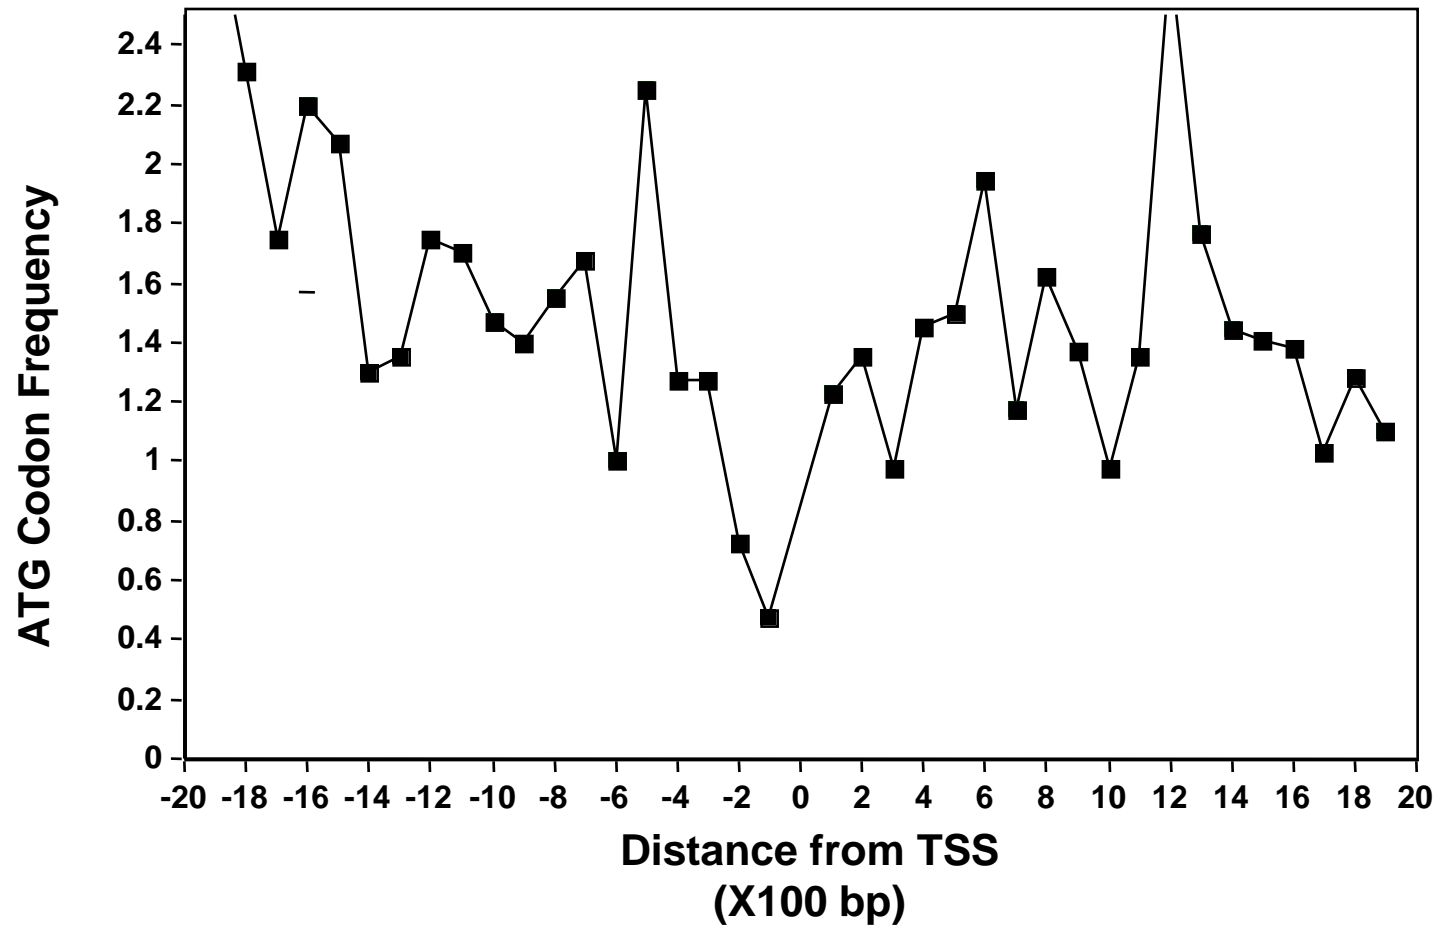

## Supplementary Figure 2.

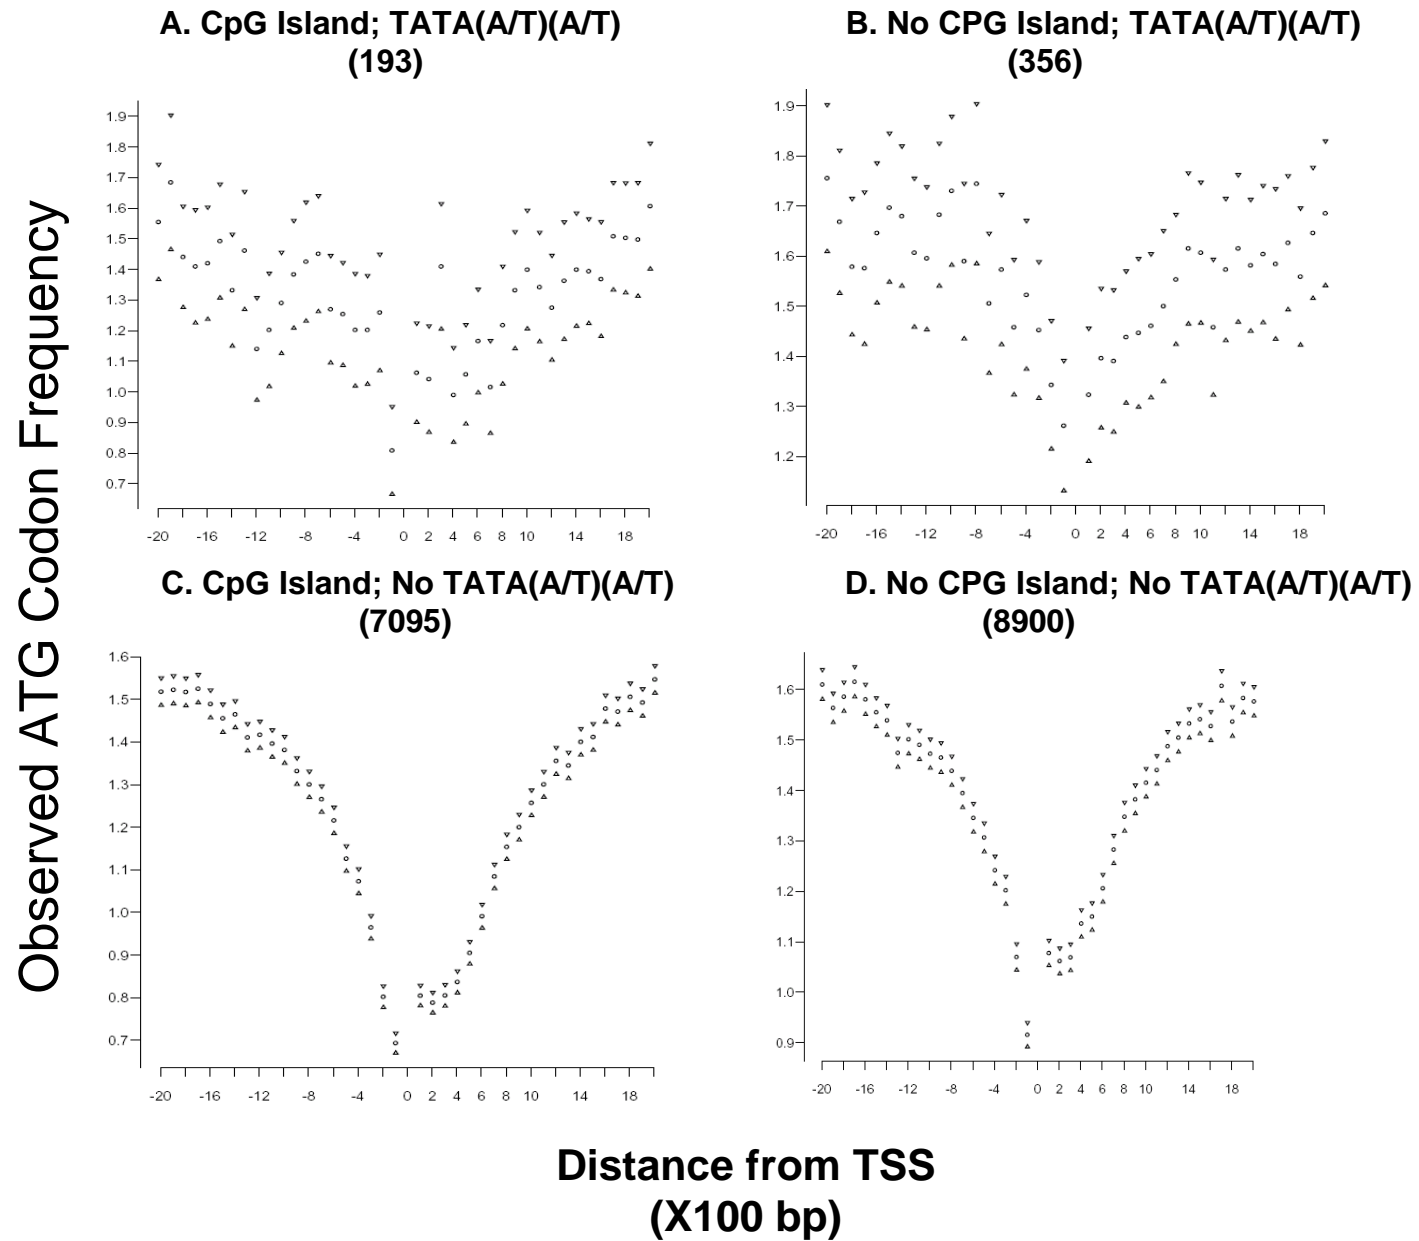

# Supplementary Figure 3

## A. Non-TATA Promoters

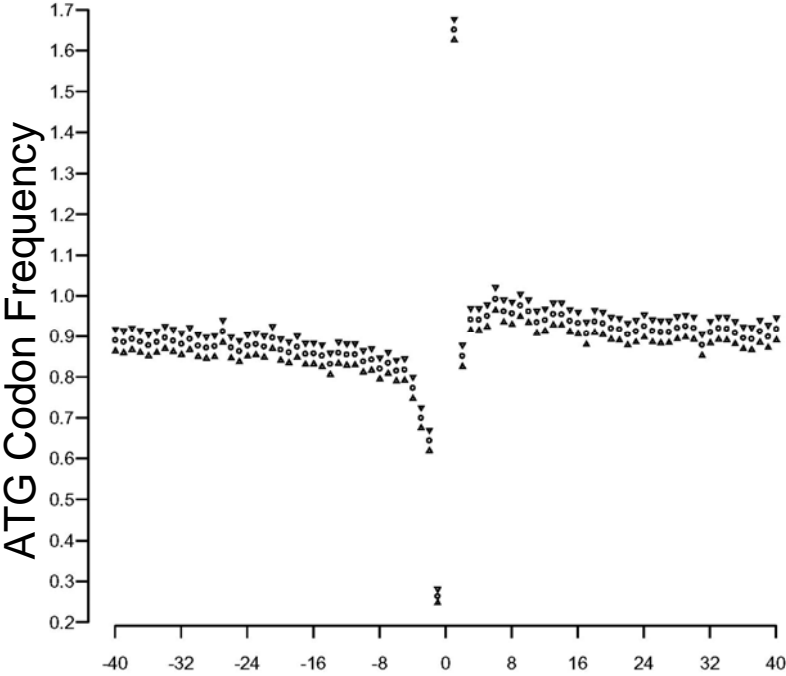

## B. TATA Promoters

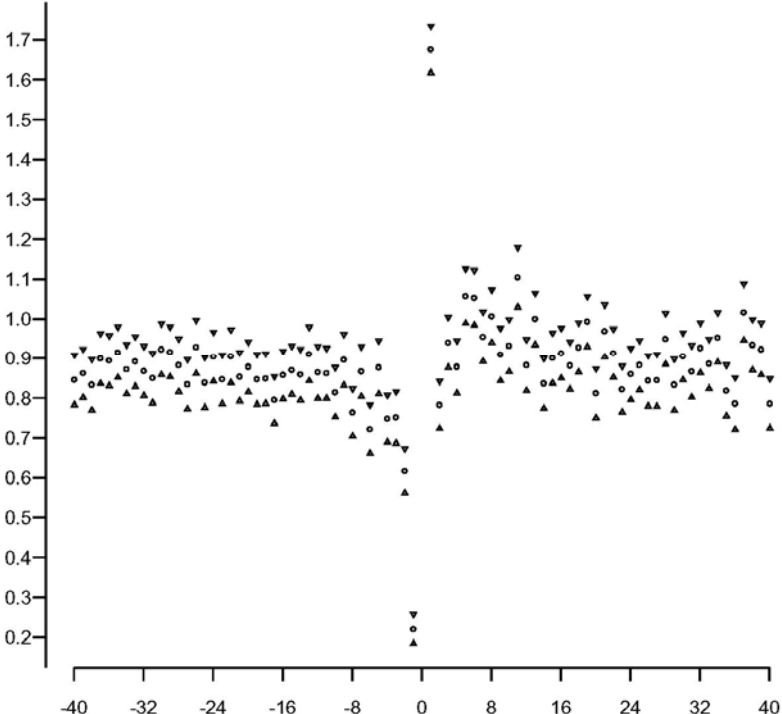

Distance from TSS  
(X100 bp)

## Supplementary Figure 4.

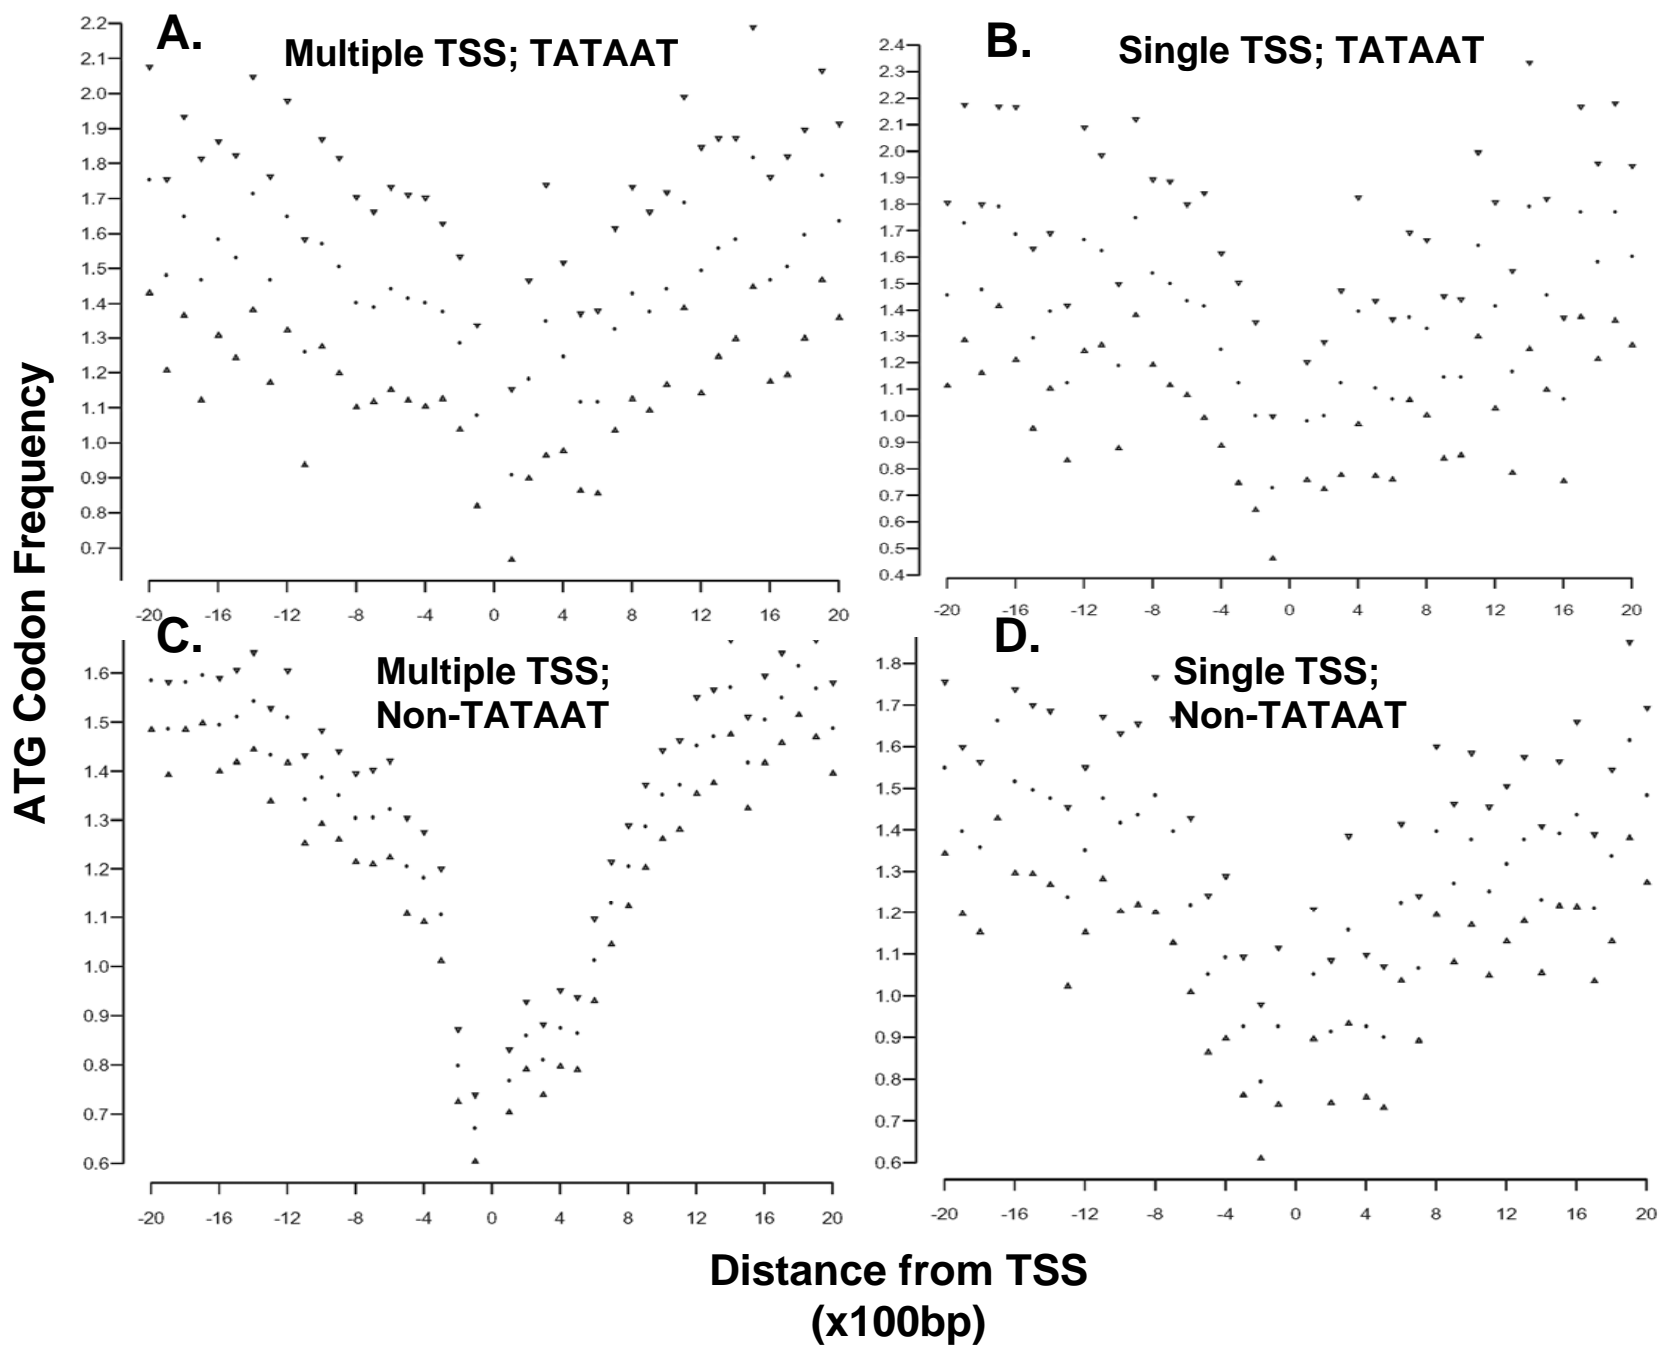

# Supplementary Figure 5

ATG Codon Frequency

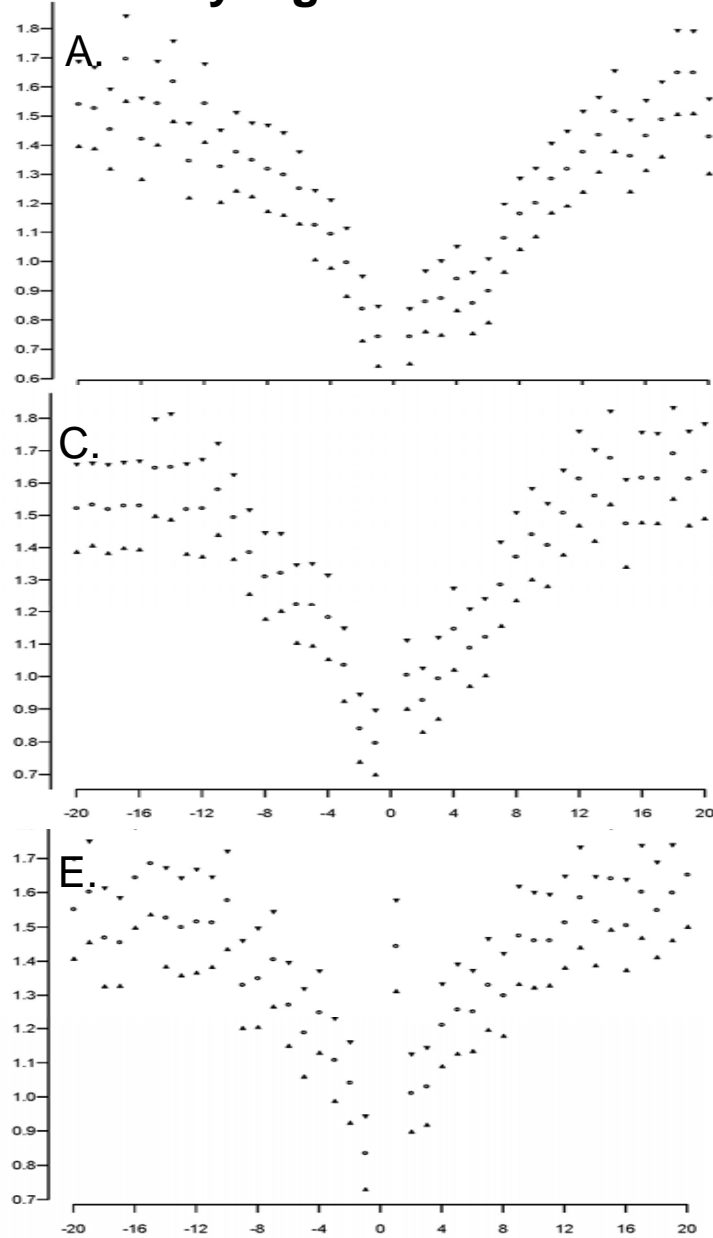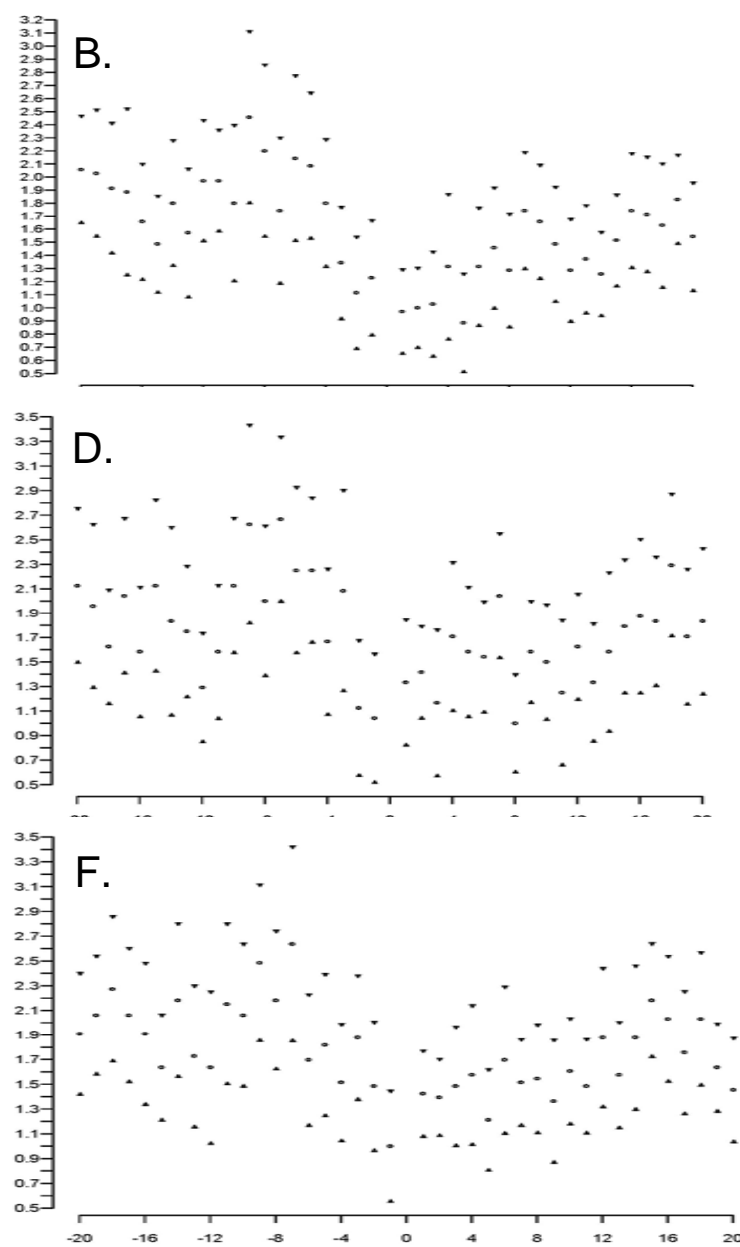

Basepairs (x100)  
Distance from TSS Initiation
